# Supplementary material for: Integrating uncertainty propagation in GNSS radio occultation retrieval: from excess phase to atmospheric bending angle profiles
Source: Copernicus journal article supplement (doi:10.5194/amt-2017-159), 2017-06-13
Supplement: Supplementary file [file amt-2017-159-AC1-supplement.pdf]

## **Response to Referee #1**

Manuscript "Integrating uncertainty propagation in GNSS radio occultation retrieval: from excess phase to atmospheric bending angle profiles"

by Jakob Schwarz, Gottfried Kirchengast, and Marc Schwaerz,  
AMT Discussions paper, doi:10.5194/amt-2017-159

=====

*We thank the reviewer very much for the constructive and detailed feedback to our manuscript. We thoroughly considered all comments and carefully revised the manuscript accounting for most of them. Below are our point-by-point responses.*

*Comments by the reviewer are cited black upright, our responses are **blue italic**. (line numbers used in our responses refer to the original AMT Discussions paper and text updates in the revised manuscript are quoted below with **yellow highlighting**)*

### **General comments**

The paper details the algorithms, the underlying assumptions and the results of the uncertainties estimation (random and systematic) in the GNSS radio occultation (RO) retrieval, from the excess-phases to bending angle profiles. The paper, together with other similar papers which address the same topic once applied to the other portion of the entire RO processing chain (thus describing error propagation through the POD solution and through the retrieval steps of atmospheric profiles starting from bending angles), provided for the first time a rigorous mathematical overview of how errors are propagated through the entire RO processing chain. From the scientific point of view the paper is almost complete; involved data, algorithms, results, discussion and conclusions are presented in a well structured and clear way, even if the paper is excessively long.

In what follows some general comments are provided.

1. One of the most critical step of the RO processing chain is the retrieval of bending angles in the lower troposphere, which involves more "advanced" methods (the so called **Wave Optic retrieval**). Unfortunately error propagation through this step is not detailed (even if a paper is already available since 2015, it is written a couple of times in the manuscript that the implementation of WO uncertainty propagation in the rOPS is not yet finished... so it is not fully clear whether the results are already available or not). In order to have a complete and more coherent overview, this part is somehow necessary. My suggestion is, if results are not available yet, to remove from this paper all the discussions provided on the WO retrieval and error propagation through it (Sect 3.2.2, Sect 3.2.3, Annex A2.2, Annex A2.3), changing a bit also the title reflecting that only GO retrieval is applied.

*We carefully checked the impact of this alternative of dropping the link to WO in this paper and found it would do no good to the readers if this paper would not clearly show how the WO uncertainty work as introduced by Gorbunov and Kirchengast (2015; 2017) is embedded in the overall bending angle retrieval, including in*

particular the merging of WO and GO and of their uncertainties. That is, even though the testing and integration-test approval of the WO uncert.prop. in the rOPS—implemented as discussed by Gorbunov and Kirchengast (2017)—is not yet completed so that we could not yet use the WO results in this study, we know with confidence that the subsequent algorithm step in the rOPS uncert.prop., the merging of GO and WO uncertainties, can be mathematically implemented and tested independently. This holds, since only if the WO uncertainty propagation would deliver large outliers with unexpected behavior there might be problems; but we know from WO tests this not to be the case. Also, since we tested a whole day of real and simulated data with a relatively large variability in  $u^r$  (and offline with some even larger test magnitudes), the stability of the merger-algorithm itself is evident for any reasonable magnitude of the uncertainty profiles delivered by the WO uncert.prop. In other words, using in this paper the uncertainties from the GO also as WO input for demonstrating the merger, allows us to have this way a sound “proxy” to reasonably cover the possible variability of the input uncertainties coming in future from WO.

We realize, though, that we need to update the text at several places (given that the Gorbunov and Kirchengast 2017 AMT paper is meanwhile in press and the rOPS implementation of WO is meanwhile in integration tests), aiming to make the value of linking to WO in this paper and also the referencing more clear. We note that—similar as done in Schwarz et al. Earth Space Sci. (2017) for the refractivity and dry-air retrieval—the focus of this study is on the careful introduction of the (formally correct) algorithms and on the demonstration of the robust performance, and less on the delivery and presentation of real/realistic uncertainty propagation results (see also our response to Comment 3. below). So we think that presenting the successfully implemented merger algorithm makes sense and is useful to the readers of this study. It also will allow for a more concise presentation of the WO uncertainty propagation as part of the complete chain in a future publication that will then show real-data results from the complete rOPS chain.

We updated the text that refers to the uncert.prop. through the WO bending angle retrieval and the merging operator particularly in the following parts:

On p11,L3, we updated and improved to “Because the rOPS implementation of the WO uncertainty propagation (Gorbunov and Kirchengast, 2017) was still in test phase and not yet available for integration into the simulations here, all examples in this study...”

and on p11, L6, to “In order to nevertheless test and validate the uncertainty propagation of the merging algorithm, WO retrieval results were artificially substituted by the GO results for the MC validation (Section 4), i.e., GO was used as proxy for WO since reasonably capturing expected WO variability as indicated by tests of Gorbunov and Kirchengast (2017).”

and on p24, L18, to “...prepared the merging with the WO bending angle variables (they will be actually merged in when the WO tests within the rOPS is complete), which is described next.”

2. Another general issue I want to highlight is that the entire discussion and the main results shown from Fig 3 to Fig 8 are based considering an excess-phases "time

series" and associated random/systematic uncertainties observed during **one real occultation event from the COSMIC mission, taken as representative for the entire day**. Not sure that the heuristic associated to the choice of that particular profile is correct, since the ensemble mean profiles of the uncertainties associated to the various variables involved in the retrieval (Fig 10 and Fig 11) show quite different behavior (see for example the increasing of uncertainties with height). It would be nice to have different examples (maybe the best and the wrong together with this most representative one).

*With Figures 3 to 8 we followed the same didactical approach in introducing the algorithmic steps in combination with some illustrative figures for an example event as we did in the Schwarz et al. Earth Space Sci. (2017) work. The key aim of the algorithm description in chapter 3 and the figures 3-8 is to illustrate the effects of the operators in the rOPS uncertainty and not to show the input-to-output profiles uncert.prop. performance through the chain (this is for the later figures with MC validation and full test-day results). It is for this aim that we found it most clear not to overload these illustrative figure with complex information of more than one example event (or have otherwise even more figures in what is already a quite extensive paper).*

*In this study we chose one real profile as example profile, rather than a simulated profile as in the Earth Space Sci. paper, to capture for bending angle retrieval with its higher sampling rate more characteristics of real profiles typically processed. Still the chosen (COSMIC) example is only used to illustrate the effect of the operators, its random and systematic uncertainty is representative in terms of magnitude and correlation lengths for the profiles encountered in a real processing. It is not intended to be "representative" also in the sense that the results match a quantitative "best case", or "average", or similar. This was also found suitable, since the input profile uncertainties at excess phase level are as yet not the "real" input propagated from the rOPS L1a processing, but rather a proxy and "reasonable guess" input.*

*Regarding the test-day ensemble, the mean of the test-day random uncertainty profiles indeed increases between 70 and 75 km, but this effect is stemming mostly from a relatively small share of profiles with large random uncertainty, thus also not being particularly representative for the majority of profiles.*

*Concerning the use of the "time series" principle, we refer to our response to the reviewer's specific comment below related to "Page4, L9-10".*

*So overall we preferred to continue using and illustrating just one example event, based on the reasons above; also avoiding crowded plots or too many figures in total.*

*However, in order to avoid an interpretation of our example profile as „corresponding approximately to the average uncertainty profile of the test-day RO events“, we replaced „a representative“ by „an example“, on p3, L27, and we toned down „a representative“ to „a typical“ on p6, L9 (and from this point on the event is called „example case“ anyway, as defined at the end of this sentence).*

3. Regarding the same input profile I found a bit inconsistent the **choice of extrapolating downward 30 km** the representative excess-phase random uncertainty profile (defined on the above mentioned COSMIC observation) with a

linear behavior (I guess linear in order to provide a "worst" boundary, could you confirm this in the paper?), whose gradient follows some estimate defined for the GRAS instrument on board METOP satellites (and I don't think that in the provided reference [ESA/EUMETSAT] such information can be easily found). The systematic uncertainty on the same input variable is also defined following error estimates characterizing the GRAS receiver. The big question is why you mixed the random uncertainty "rigorously" derived considering a COSMIC observations with some heuristic based on the GRAS instrument? Was not better to derive the random error profile from GRAS real observations? And why for the GRAS case you demonstrated the uncertainty propagation using simulated data only? Please provide a clear motivation on this or repeat the entire analysis using some representative examples taken by GRAS excess-phases.

*The main intention of this study was to develop, implement, validate and demonstrate the mathematically correct propagation algorithms for bending angle retrieval, under as few assumptions as necessary for a successful application of the uncertainty algorithm to RO data in the rOPS; so same intention as Schwarz et al. Earth Space Sci. (2017) for refractivity and dry-air retrieval. The quality and realism of the propagation results in absolute terms will of course strongly depend on the uncertainty profiles used as input at excess phase level; as also the test-day ensemble results indicate. Since for this study realistic full-profile rOPS L1a uncertainty estimates were not yet available at excess phase level, we decided for viable proxy input profiles with realistic order of magnitudes in terms of variance and correlation length.*

*Regarding the altitudes below 30 km, we chose to replace the noise-estimation scheme by a simple linear model below 30 km, because the empirical estimation approach from the noisy time series (as described in section 2.2, esp. Eq. 5 and the related text) becomes increasingly vulnerable to biases and fluctuations below 30 km due to the strong (near-exponential) increase of the excess phase magnitude. The simple linear model chosen was in fact consistent with that ESA/EUMETSAT reference as well as roughly with the overall behavior of COSMIC-profile based estimates below 30 km (which were not stable enough to be used directly).*

*To be more clear with our rationale for the construction of the input profiles used, we updated on p6, L26-28, to: "While in future the excess phase random and systematic uncertainty profiles will be more rigorously estimated by the rOPS L1a processor (Innerkofler et al. 2016) and provided as input to the L1b processor, they had to be estimated for this study from existing excess phase profiles with realistic noise (we chose UCAR/CDACC ones) and simplified modeling. To this end..." and on p7, L7, to "...roughly following estimates of ESA/EUMETSAT (1998) and the overall behavior of estimates from real excess phase profiles (the latter became too vulnerable to biases and fluctuations to continue using them below 30 km)."*

*On the demonstration of the uncertainty propagation related to GRAS for simMetOp only, we agree that this was not really justified well (we had decided for it to save in particular some space in figures and text since we considered simMetOp is there anyway).*

*We therefore included real MetOp data now (updated Figures 10 and 11, and related text updates), in particular involving the following updates:*

on p3, L29-31, to "...CHAllenging Minisatellite Payload (CHAMP) (Wickert et al., 2001), FORMOSAT-3 Constellation Observing System for Meteorology, Ionosphere, and Climate (COSMIC) (Anthes et al., 2008), and Meteorological Operational Satellite A (MetOp) (Luntama et al., 2008), and with simulated data..."

on p6, L4, to "For CHAMP, COSMIC and MetOp, orbit..."

on p7, L24, to "...for MetOp and simMetOp."

on p14, L2, to "...complete test-day of real (CHAMP, COSMIC, MetOp) and..."

on p14., L29ff, expand to "For the real MetOp data (available here as dataset from UCAR/CDACC, as for CHAMP and COSMIC),  $urLF1$  appears similar to COSMIC (cf. Figures 10d, g) while for simMetOp (with best possible simulated GRAS-type receiver noise) it is clearly smaller than for COSMIC. From 35 to 80 km the mean random uncertainty profile for simMetOp stays below 1 mm (Figure 10j). Three individual profiles exhibit comparatively high uncertainties of larger than 2 mm within about 40 to 55 km, however, reflecting that the simMetOp error simulations are capable to partly generate higher-noise profiles of the type more frequently seen in the real MetOp data (Figure 10g).

On the other hand, the average correlation length/resolution profile of the ~500 real MetOp and ~700 simMetOp ensemble members is very similar, driven by the orbit being essentially the same for the real data and the simulations (Figures 10h, i, k, l). Compared to COSMIC (Figures 10e, f), the correlation length and resolution are again somewhat larger/coarser, due to an even somewhat higher scan velocity of the MetOp satellite (~820 km orbit altitude).

The systematic uncertainty  $usLF1$ , just co-illustrated for completeness in Figures 10a, d, g, j, is almost..."

on p15, L24, to "...for three different missions (CHAMP, COSMIC, MetOp) show..."

on p45, caption of Figure 10, update to "...for CHAMP (a); COSMIC (d), MetOp (g), and simMetOp (j)." "...for CHAMP (b), COSMIC (e), MetOp (h), and simMetOp (k)." "...for CHAMP (c), COSMIC (f), MetOp (i), and simMetOp (l)."

on p46, caption of Figure 11, update to "...shown in colors (CHAMP (yellow), COSMIC (orange), MetOp (red), simMetOp (violet)). Left column:..."

4. And, always on the definition of the input random uncertainty example profile, does it takes into account the **merging of open loop and closed loop data** somewhere in the lower part of the profile? I guess that the uncertainties related to the open loop and closed loop tracking should be different (because of different noise levels added by the different tracking behavior, because of different sampling rates between OL and CL, which is different from COSMIC and GRAS for example). Maybe the "boundary" set with the linear extrapolation downward the 30 km includes already these different uncertainty levels. But I expect that a discussion on these aspect will be added in the paper.

As detailed in the response to comment 3 above, the current input uncertainty model does not include sophisticated estimations of the diverse real error sources in the POD and excess phase profiles, being part of L1a processing, But as noted, this is



*not needed for the algorithm introduction and demonstration context of this study; and these sources will be accounted for in future when the rOPS L1a processor provides the profiles and uncertainties as input to the L1b processor.*

5. All the analysis is based on the covariance matrix propagation through linear (or linearized) operators. This is fine. But what are **the residuals effects due to the linearization**? I guess that the most "critical" linearization is the one applied to impact parameter retrieval (in GO). In that case I guess you can quantify the second/higher order effects by considering more terms in the Taylor's expansion of the operator.

*Relative to the state profile magnitude, the magnitude of the uncertainties is generally very small, and the uncertainty of the uncertainties is even smaller. The relative accuracy of the uncertainty estimates we aim to achieve is within +/-3% when quantitatively determined from Type A evaluation (already comparable to a relative accuracy of the state profile of about  $10^{-4}$ ). The main source of uncertainty in the uncertainty estimates stems from Type B evaluation (particularly for the estimated systematic uncertainty), where it is almost impossible to push the error of the uncertainty estimates to below +/-10%. Given this context we thus consider the ~2% error due to the linearization in the propagation of the bending angle random uncertainty (we agree, the relatively largest error source) as acceptable (p21, L31).*

6. Finally, the most important references related the main topic of the paper (the description of rOPS and of the algorithms involved) are presentations to conferences or not accessible technical reports. This is a pity. **But at least, for the presentations it would be nice to have the full web-link specified.** The paper is absolutely worth to be published, but some review/clarifications should be provided. That's why I suggest for a major review. Specific and technical comments are provided in the next two sections.

*Yes, the general manuscript introducing the rOPS is still in preparation and so cannot be cited yet. We agree that providing ready access to the presentations is thus useful. We therefore added the web-links for the following presentations:*

*p32, L28: Kirchengast et al. 2015: <http://irowg.org/wpcms/wp-content/uploads/2014/05/Kirchengast-IROWG-4.pdf>*

*p32, L31: Kirchengast et al. 2016a: <http://meetingorganizer.copernicus.org/EGU2016/EGU2016-12035-1.pdf>*

*p32, L35: Kirchengast et al. 2016b: [http://wegcwww.uni-graz.at/opacirowg2016/data/public/files/opacirowg2016\\_Gottfried\\_Kirchengast\\_presentation\\_261.pdf](http://wegcwww.uni-graz.at/opacirowg2016/data/public/files/opacirowg2016_Gottfried_Kirchengast_presentation_261.pdf)*

*p33, L1: Kirchengast et al. 2017a: <http://meetingorganizer.copernicus.org/EGU2017/EGU2017-16328-2.pdf>*

*p34, L27: Syndergaard 1999: <http://www.cosmic.ucar.edu/groupAct/references/Sr99-6.pdf>*

*And on the detailed algorithmic documentation “behind” the papers (also addressed by the reviewer in a further comment below): The main cited source for the rOPS algorithm documentation, the DAD (Kirchengast et al., 2017b) is indeed not yet publicly available in its current 1.7 version, because it needs to be completed and polished in some (other) chapters and in its introduction and overview. However, we can assure that the DAD is firmly scheduled as an open document, to be published as soon as the journal publications of the introduction and main components of the rOPS and the first reprocessing are complete (expected in 2018). We therefore strongly think it is valuable to quote the DAD also in this publication, so that future readers of any rOPS article (including this one) can readily get to it as soon as it is public, since also many years from now they will find it clearly referenced in all relevant journal publications collectively introducing the rOPS. This “foresight” was also the justification for citing it as reference in the Schwarz et al. Earth Space Sci. (2017) publication, the Gorbunov and Kirchengast Atmos. Meas. Tech. (2017) in press publication, etc.*

---

## Specific comments

### Page 2

#6: what does it mean that “the accuracy is also ensured on-orbit”? please specify

*The way we read the decadal survey (NRC 2007, p 64) is that for climate benchmark data, the accuracy needs to be ensured by the remote sensing technique itself (as with the self-calibration property of RO), rather than through e.g. bias-correction on the ground, to ensure reproducibility in the future with independent means.*

*We improved it to “...the accuracy is also ensured on orbit, i.e., there is no need for calibration or bias correction in post-processing on ground (Leroy et al., 2006).”*

### Page 3

#21-22: remove references to unpublished papers or to papers in preparation. It is already mentioned that work is on-going.

*Ok, we dropped these references to “papers in preparation” and hence simplified the text at this place to “...are part of on-going work (Innerkofler et al., 2016).” and, two lines below in L24, to “...and corresponding L2b uncertainty propagation is on-going (Li et al., 2017; Kirchengast et al., 2017a).”*

# 31: first mention of the use of simulated data for GRAS.

*See response to major comment 3 above: a test-day with real MetOp data was included now and hence the real MetOp(-A) is also mentioned at this place now.*

2.1 Methods: all the analysis is based on evaluating random/systematic uncertainties as complete independent processes. Could you please explain why the two are completely decoupled? This is probably trivial under the assumption that noise is normally distributed. But is this really the case starting from excess-phases?

*The criteria for separating the evaluation and propagation of estimated random and systematic uncertainties is that the processes giving effect to these uncertainties need to be uncorrelated (if the correlation term is zero, the other terms can be pulled out of the sum). This is independent of the shape of the probability distribution (if a process causes a biased mean of the pdf, it is counted to the (basic) systematic uncertainties, such that the random uncertainty can be assumed unbiased). The basic systematic uncertainty is caused by processes that repeated measurements under (almost) the same conditions could not detect, e.g. insufficiently defined physical constants, most model parameter errors, etc. It can thus not be correlated with effects of processes that give different results under repeated measurements.*

*The random und apparent systematic uncertainties on the other hand can be seen as uncorrelated for an analogous reasoning: Since we separate them based on correlation length, the apparent systematic uncertainty appears as a bias within the, e.g., 0.8 seconds of the Blackman window (correlation coefficient of unity over the window range), while the random uncertainties' correlation function typically decays down to zero within this range. So even if random and (apparent) systematic uncertainty were correlated at one side of the Blackman window, they will be clearly uncorrelated at the other. It is crucial, however, that the correlation lengths of the random and the systematic uncertainties remain clearly separable; would the random uncertainty be strongly correlated also over longer time windows (appearing as a bias), it could be also correlated to the systematic uncertainty (a situation that, favorably, does essentially not occur in practice for RO data processing).*

*Thus, in practice, while there might be (very) slight correlations between random and systematic uncertainties at times, we consider the additional insight from having random and systematic effects separately available more important than the problem of potentially (very) slightly overestimating the uncertainties of our RO profiles.*

*In order to further help understand this, we now added on p4, after L20, another sentence/small paragraph as follows: "Since the noise-type effects giving rise to short range-correlated random uncertainties can be considered uncorrelated to the bias-type effects inducing long range-correlated apparent systematic uncertainties, and since both are uncorrelated to basic systematic uncertainties, it is insightful and possible with due care to estimate and propagate each of these uncertainties independently."*

#9-10: not clear why the effects of temporal/spatial variations (which kind of variations have you in mind?) in repeated observations can be estimated based on an individual RO profile. This is one of the main issue. Describe/motivate this better. And, by the way, why this should be true based to oversampling in the RO raw data profile?



*This relates to GUM concept. The idea behind this evaluation method is an assumed ergodicity of the essentially stationary observation system (in our case the gaseous atmosphere viewed as a random field), and thus equivalence between the repeated measurements within one RO event (e.g., excess phase sampled at many different atmospheric levels), and measurements from an ensemble of multiple RO events (e.g., excess phase from many events at a certain atmospheric level). Effects causing such ergodic random variations could be the thermal noise of the receiver system, to some extent random uncertainties in the positions/velocities of the receiver and transmitter satellite, the clocks, atmospheric small-scale fluctuations, residual ionospheric fluctuations.*

*We tried to improve the paragraph on p4, L8ff, to: "... Effects of unpredictable or stochastic temporal and spatial variations in repeated observations—like effects from fluctuations in the atmosphere or the thermal noise of the receiver system—could in principle be estimated by ensemble statistics from multiple RO events. However, since such effects are essentially stationary in a statistical sense, we can estimate their statistics also from individual RO event data, given their high noise-resolving sampling rate. These effects are included in the estimated random uncertainties."*

#29: what do you mean with ionospheric noise? Here you are describing the noise in excess-phase measurements, so on both L1 and L2. Are you referring to scintillations? I don't think these can be treated as "normally distributed noise". Define this better.

*Ok, we improved this and wrote now "...the receiving system noise (i.e., thermal noise and residual clock estimation noise) and the ionospheric noise (from scintillations induced by ionospheric irregularities) are essentially normally distributed overall (Kursinski...). These noise sources are the main contribution to..."*

#29: Why random errors on positions/velocity are not considered here (later on, page 5 #30 you introduce such effects within the systematic uncertainties)?

*Our rOPS L1a-related studies concerning uncertainties in transmitter- and receiver orbit positions and velocities show that the magnitude of temporal variations within the typical RO event duration of just 1 minute or less for scanning over the 80 km to middle troposphere altitude range are very small, i.e., orbit arcs are in practice very smooth at this RO-event timescale over the altitude range where excess phase magnitudes are less than 100 m (i.e., where the typical mm-level to cm-level noise sources will possibly be non-negligible). POD errors may thus be considered (quasi-)random on full-day timescales or so, but well classify as apparent systematic uncertainties within the 1-min time intervals of individual RO events.*

Page 5

#24-25: not clear what "is aligned to a joint resolution..." mean. Please rephrase/clarify.

We rephrased p5, L24, to: "...the resolution of all profiles is brought to a common altitude-dependent resolution, which reflects..."

Page 6

#7: It would be nice to motivate clearly here why you are using simulated data for propagating the uncertainties for the GRAS case.

We used the simulated data as a lower bound 'best-possible' case, to see how low-noise data would be propagating through the algorithm. We now also processed real GRAS data additionally to the simMetOp data – see under major comment 3 above for all the related updates.

#13-14: clarify why the "baseband" approach allows to avoid biases from numerical operations on near exponentially varying profiles (also repeated at page 17, #11-12).

Ok, improved this sentence to "...varying RO profiles, since the model profiles that we derive from short-range (24 h) forecasts of the European Centre for Medium-Range Weather Forecasts (ECMWF) skilfully subtract the (near-)exponential variation. The remaining increment profiles that we need to treat numerically then appear to be very linear and with low dynamical range, which leads to very low residual numerical errors of operators such as filters and derivatives."

Page 7

#4-7: here is where the downward extrapolation based on a GRAS "model" is described. See point 3 of General Comments.

To clarify our view of the nature of the input profiles used, we changed on p6, L26-28, to: "While in future the excess phase random and systematic uncertainty profiles will be more rigorously estimated by the rOPS L1a processor (Innerkofler et al. 2016) and provided as input to the L1b processor, they had to be estimated for this study from existing excess phase profiles with realistic noise (we chose UCAR/CDACC ones) and simplified modeling. To this end..."

#4-7: why linearly extrapolating downward and constantly extending upward a "random" uncertainty profile does not introduce a systematic effect?

We do not manipulate the state profile, only the magnitude of the random uncertainty profile. Technically, of course, the random uncertainty is not completely correct at the extrapolated sections, but this is equally true for the section with the noise-based estimation. As described in the response to comment 3, we only create a proxy-input to work with. Also, we only manipulate the magnitude (variance) of the uncertainties, not the correlation structure.

#8: Please clarify further why all the noise components responsible for random uncertainty at excess-phase level are uncorrelated (also referring to the ionospheric noise). I believe that at carrier phase level noise is uncorrelated (we have basically phase noise). But when geometry is removed as well as clock biases, and when the result is interpolated to match 50 Hz sampling rate (maybe between open and closed loop observations), I'm not sure that the various components are still uncorrelated.

*Our assumption is that these random effects are only correlated within the range of the BWS-filter width and we can thus start the L1b processing with the assumption of vertically uncorrelated errors. The analysis of the uncertainties in the L1a processing will show whether we will be able to uphold this clear distinction (i.e., in practice, the rOPS system checks this expected very-narrow-correlation between the L1a and L2b processing, by empirically estimating the excess phase correlation matrix from a large ensemble of L1a output profiles around the "currently processed day"; in case the random error correlations would appear too strong, we would feed the L1b processor with a correlation matrix that is non-diagonal accordingly). On the other hand, if a bias is found introduced and determinable, it will be corrected for (according to the GUM); if we can't determine it, an increase of the residual systematic uncertainty bound estimated would be the way to account for these components.*

*We have added on p7, in L10, the sentence: "...for both channels. In case the future excess phase data from the rOPS L1a processor exhibit non-negligible correlations for some data from some of the RO missions, we will account for these correlations in R\_Lr, since our L1b algorithm (Section 3) is prepared for full covariance propagation."*

#14: Being the entire analysis based on a COSMIC profile, why for the MC validation you started from a simulated CHAMP excess-phase profile and not from a realistic COSMIC profile? Motivate it.

*Ok, we added on p7, L15: "... receiver system errors superimposed). Using an 'error-free' profile as basis, the particular simulated profile just serving as a representative RO profile to illustrate the MC validation, allows us to strictly ensure the consistency of the random uncertainty of the input profile with the ensemble of superimposed error profile realizations."*

#24: in defining the input random uncertainty profile, you are computing the excess phase mean value between 60-70 km. Is the constant part of the systematic uncertainty consistent with such a mean?

*No, in the current simplified input uncertainties modeling that we use in this study for introducing the algorithm (not focusing on realism of input and output, as explained in our response to comment 3 now), we don't consider this "empirical value" as viable basis for quantifying systematic uncertainty.*

#Eq 6 and 8: Explain why the "gradient" ( $1/3\exp(xx)$ ) for the random and the systematic uncertainties below zGrad is different.

See our response to comment 3, where we explain our simplified modeling below 30 km, and note the improvements we did to the text in the revised manuscript. Specifically to the systematic uncertainty, we in addition extended on p7, L24, to: "...linear uncertainty gradient in the troposphere; as noted above this simplified modeling will be replaced in future by realistic uncertainty estimates received as L1b retrieval input from the L1a processor (Innerkofler et al., 2016)."

Page 9

#20-21: not clear the sentence. By the way, it would be nice to show the relative error (to the state profile) instead the absolute one.

*We reconsidered this but preferred to stick to the rationale of our original choice here – i.e., the main two reasons why we chose to plot the absolute uncertainties, are 1. that the range of the uncertainties is relatively constant in absolute terms but strongly decreasing in relative terms, particularly for the excess phase and Doppler shift uncertainties, and 2. that when plotted in relative terms, it adds difficulty and ambiguity to the interpretation of the results, due to the influence of the denominator. Furthermore, to keep the plots consistent throughout all figures, we preferred to keep ALL subplots of all these figures in absolute terms, optimizing comparability (we also tried double-axes but it overcrowds the figs, or considered to show both separately but that leads to too many figs in what is a long paper already).*

Page 10

#25: What is written there is true, but this is not clear whether these results (and the merging with bending angles uncertainties derived by GO processing) are available or not (#3-5 p 11 it is clearly stated that their integration in rOPS is not yet finished). I suggest to remove any reference to uncertainty propagation through WO/merging unless the results can be shown. See general comment 1).

*Please refer to our response to general comment 1, we hope with that extensive answer (and the related improvements) our solution to this issue in this paper became clear.*

Page 11

#6-8: this is definitely not clear. How you can "artificially" substitute WO with GO uncertainty propagation, being the vertical domain of their applicability different?

*Please again refer to our response to general comment 1, also this should be clear now.*

#17 and 20: Not clear why the low-pass filtering of alphaM1 provides so different random uncertainty levels and broaden the correlation functions if the cut-off

frequency is the same of the one already used to filter the corresponding excess-phases. I expected negligible or a smaller effect.

*The operations on the BWS-filtered profile, particularly the Doppler differentiation, create short-range correlation (anti-correlation) in the retrieved profiles and thus high(er) frequency variations, which are affected by the second filtering.*

*To make this more clear on p11, L14, we improved the sentence(s) to: "The chosen filter cutoff-frequency for  $k = 1$  is  $fc1 = 2.5$  Hz, same as the basic filtering (Section 3.1.1), just to ensure clearness of any higher-frequency effects from operators after the initial excess phase filtering (e.g., from Doppler shift derivation that induces short-range anti-correlation effects). For  $k = 2$ , the cutoff-frequency  $fc2$  is set noise-dependent, between 2.5 and 0.5Hz (boxcar equivalent width of 0.2 to 1.0 s)."*

Page 12

#23: I found inconsistent defining the input data for the MC simulations by using a "background" error-free excess-phase profile taken by a simulated CHAMP event (mentioned not here but at page 7, #14) plus error realizations taken by a COSMIC dataset. The description of this input dataset should be better motivated and clarified. Moreover the input for the covariance matrix (for the MC simulation) seems to be some standard profile uSTD,Lr not well identified.

*Please see our response to the comment concerning p7, L14, above, and in particular the response to the major comment 3, including the related revisions; this should clarify our approach.*

*To put it in different words again here, for the MC validation – in our eyes and experience – the most relevant aspect of the input profiles & uncertainties is that they are exactly the same as the ones used for the CP (covariance propagation). If this criterion is fulfilled, technically ANY reasonable 1-D profile could serve as basis profile, for the purpose of validating the CP through the MC ensemble (with the latter ensemble constructed by superimposing random error realization profiles on the 1-D profile).*

#28: Here you are saying that the comparisons between MC simulations and covariance matrix propagation (CP) are carried out in terms of their decomposition (error profiles and correlation functions/lengths). This is fine but it is not clear where the CPpropagated covariance matrix comes from. What is the input? The same COSMIC profile taken as example in the previous discussion? Another excess-phase profile (more likely yes, since the results shown in Fig 9 [red, blue plots] are bit different from the same results shown in the previous figures. In #19, p7, you mentioned that "the same standard profile was used as input for the CP"). Rephrase and clarify the entire introduction to Set. 4.

*Thank you for pointing this out, we seem to have created a misunderstanding from some lack of a bit of info how the CP matrices come into play here.*

*We now updated the text on p12, L28, to: "...are calculated (Items b-g in Figure 2). Using the same input profile and uncertainty information as used to specify the MC runs (described in Section 2.2), the retrieval is then also run with covariance-based*



uncertainty propagation and the resulting CP-propagated covariance matrices  $C_X^{CP}$  are compared to the MC-derived matrices  $C_X^{MC}$ . In order to be able to attribute..."

Page 13

#7: the information provided in Fig 9 are not so clear. First of all are the random error profiles taken to lie between the boundaries provided by blue/orange lines used to plot  $L_r$  (thus varying up to 20 mm)? Could you use other styles to plot such information (dotted lines or different colors). Why the area within the LF random uncertainty is colored?

*We tried a lot to make this fig informative, and in terms of how to show we did not find a really better solution. However, we clarified its explanation in the caption in that we updated the caption of Fig 9 in several places, as follows:*

*in first sentence to "...consecutive retrieval steps are shown for LF (a-c; in a-b also for  $L_r$ ) and  $D_r$  (d-f) relative to...";*

*in second sentence to "...shows estimated random uncertainties for  $f_{T1}$  (CP in blue, MC in black, in (a)  $u_{Lr1}$  in light blue), the middle column for  $f_{T2}$  (CP in red, MC in black, in (b)  $u_{Lr2}$  in orange), the right column...";*

*in third sentence to "...variance propagation ('VP') results (light blue) for  $\alpha_r$  in (n)."*

#13-14: why it is "obvious" that the CP delivers the correct off-peak results? Provide a clarification.

*Since we start with a diagonal covariance matrix with no correlation between distant elements and only apply a filter with a limited filter-width (corresponding to a band-matrix), the correlation of the current element with any element outside the filter window must be zero.*

*We updated on p13, L14, to: "...that the CP delivers the correct off-peak results (i.e., zero; the off-peak elements outside the BWS filter window must nominally be zero)."*

#17-21: rephrase a bit the sentence, since it is not clear.

*Ok, we changed the text part on p13, L17ff, to: "For comparison, in Figures 9a to 9f, all quantities have been computed on the common time grid ('setting time' relative to time zero at 80 km altitude) with 50Hz sampling rate; and the corresponding impact altitude of the 'true' profile  $L_{Tr}$  is shown for additional convenience on the RHS axis. In Figures 9g to 9o, these bending angle quantities have been computed on the impact altitude grid; in these cases therefore the corresponding setting time of the 'true' profile is shown for additional convenience on the RHS axis."*

Page 14

#9: Are outliers defined in term of individual random uncertainty profiles? Or input Excess-phases profiles?

*Ok, to better clarify this we updated the text on p14, L8-9, to: "...because they were detected as outliers based on the magnitude of their random uncertainty profiles (these outliers are not included in the number of profiles shown)."*

*We note that this was just a temporary solution for this L1b algorithms intro study; a more advanced QC is integrated as part of the rOPS L1a/L1b interfacing.*

Page 16

#7: this reference is a technical report, not accessible. Since it is quite important for the main topic of the paper, please provide an open reference if available (or avoid to cite a technical report which is not public).

*Please refer to our response to general comment no. 6; we hope our preferred approach expressed there is ok and we can implement it also in this study.*

Page 17

Eq. A2, #14: The baseband approach allows the application of a certain model (in this case the excess-phase filter) to a delta variable, which is the original variable minus a zero-order model of that variable. In this particular case the excess-phase model is obtained by forward propagating ECMWF atmospheric field. Totally fine. My issue is that the filter is then applied to the delta profile only, and the filtered "delta" excessphase is then added back to the excess-phase model. High frequency components inherently contained in the model are not filtered out. Do I mislead something? Could you better clarify, since the reference points to a presentation given to a congress?

*The understanding of the reviewer is correct; and the answer is that the forward-modeled profile is smooth over the scales of the filtering window, i.e., with negligible high-frequency components (as a side note, we experimented with making this proactively sure with some slight filtering of the refractivity model profile already before we forward-project it to bending angle, Doppler shift, excess phase; we found though, it was not needed so far; in the full chain processing we will cross-check this again whether there's any appreciable difference).*

*We adjusted the sentence on p17, L12, to: "...applying the filter only to the delta-profile  $dL_{rm} = L_r - L_m$  (with the model profile being adequately smooth over the scale of the filter window width). This approach..."*

Page 19

Eq A16, #13: the same as before.

*As used in this context, we note that the (adequately smooth)  $L_m$  and  $D_m$  model profiles are of course strictly consistent, i.e.,  $D_m$  is an accurate derivative of  $L_m$ , and, vice versa,  $L_m$  is an accurate integral over  $D_m$ .*

*Here we now updated the sentence on p19, L7-8, to: "...the zero-order Doppler shift model profile  $D_m$  is added (the latter also available from the forward modeling, in a form strictly consistent with the excess phase model profile  $L_m$ )."*

Eq A17, #15: The different coefficients identified in the first two and last two lines of  $A^{L2D}$  matrix takes care of boundary effects in applying the 5 points derivative scheme. Could you please provide a further clarification on these values or a proper reference? Also, the denominator (12 Delta t) is not so straightforward.

*Ok, the reference to Syndergaard (1999) serves this.*

Page 21

#5: about the "mean" tangent point location. How it is computed? Is it the lat/long of the intersection between the GPS-LEO line with WGS84 when the line is tangent to the ellipsoid (Straight Line Tangent Height = 0). Is there any effect on the uncertainty propagation in the bending angle profile due to an error in locating the center of symmetry? Could you provide a clarification on this?

*Ok, we added in a text part on p21, L5ff, as follows: "...at the mean tangent point (MTP) location of the RO event. The MTP location is defined as the geodetic (geographic) location on the WGS84 ellipsoid, where the straight-line path between transmitter and receiver touches this ellipsoid, i.e., where the straight-line tangent height is zero. This can be computed with very high accuracy at the sub-meter level (see Scherllin-Pirscher et al. (2017) for more details on the geolocation accuracy of RO). Using the MTP location's center of local curvature..."*

#9: the impact parameter retrieval is "mildly non-linear". Fine. But what are the effects of the non linear part in the uncertainty propagation? (see also point 5) in general comments).

*Please refer to our response to general comment 5, where we have answered to this.*

#31 - 3 p.22: This sentence is crucial but not clear. Is 2% the residual error on the bending angle or impact parameter left to the non-linearity (see above comment)? You are saying that the assumption is reasonable given the high quality of the forward modeled profiles? Why the high quality related to this error?

*As we also allude to in our response to comment 5, we use the 2 % error due to the linearization (as estimated by Melbourne 1994) as reasonable bound for another error, namely the error we make by replacing the "true" impact parameter by the "forecast" impact parameter. We then argue that, since the "replacement error" due to this is smaller than the "linearization error" of up to 2 %, we find it acceptable. Both contribute to the inaccuracy of the random uncertainty estimate  $ur_{\alpha G,i}$  and therefore we increase this uncertainty estimate by 2 % (Eq.A29). (We admit, we also in some view do not fully play the GUM recommendations at this spot as we increase the random uncertainty estimate to be conservative instead of explicitly co-estimating also these small further contributors which we theoretically could with effort). However, and important as a cross-validation, the MC validation shows that the magnitude of the combined effect of these two errors appears to be small, since the*

MC covariance matrix is calculated without the linearization (but using A22-A25) and the results are very close to the results of the CP (which does use the linearization).

To better clarify this now we updated the corresponding text on p21, L31 - p22, L2, to: "We use the forward-modeled impact parameter  $a_{tm}$  instead (i.e., adopt  $a_{tm} = a_{Tt}$ ) and accept the additional error thus incurred, assuming it is smaller than the 2 % relative error due to the linearization estimated by Melbourne et al. (1994). This is a reasonable assumption given the high quality of our forward-modeled profiles derived from ECMWF short-range forecast refractivity fields."

As a consequence we have to accept that the overall inaccuracy of our random uncertainty estimate cannot be brought below 2 %. Therefore, to ensure that our simplified estimate does not underestimate the real uncertainty, we account for the linearization error by multiplying a factor  $f_{uolin} = 1.02$  to the uncertainty..."; and in Eq.A29 we made the RHS term more clear, changing it to " $= f_{uolin} \cdot ur\_alphaG(za), i$ ."; and in the line below (p22, L5) we updated to: "In this way we acknowledge that although the calculation..."

Page 22

A29, #4:  $G(za)$  also in the first member? I'd say that is the linearization error of 2% applied to all the levels?

Yes, it is a conservative correction of our random uncertainty estimate over all grid-points, by a factor of 1.02 (see response to previous comment).

#7: in Eq A29, the random uncertainty profile  $ualphaG$  is already interpolated to common monotonic impact height grid. Why it is repeated here?

For e.g. two transmitter frequencies: The two random uncertainty profiles calculated in A28 are the uncertainties of the two bending angles relative to coordinate variable  $z_a$ , but the two 1D vectors (of the bending angle profiles) still lie on the common time grid points (and these correspond to different  $z_a$  values for each individual profile). So in order to now state each bending angle vector on the same common impact altitude grid, we would need to interpolate bending angle 2 to the grid of bending angle 1 (in practice, because we want a monotonic grid, we modify it first).

#18: "zero-order contributions and no terms higher than...". Is this the Taylor expansion used to linearize A22-A24 (zero-order is already used to identify the model applied to the baseband approach for the state vector retrieval)? Referring to point 5) in the general comment, you can estimate the effects of non-linearity on uncertainty propagation evaluating  $ualphaG$  also including higher order terms.

Ok, to avoid potential "terminology confusion" we improved on p22, in L18 to "...state quantities (serving as zero-order state) and no terms higher than..."

*And thanks for the thought (again) on the potential utility of explicitly estimating also higher-order terms to gain some estimates also on the uncertainty of the uncertainty estimates. We understand this and have loosely some (cluttered) notes in this direction but see it clearly beyond the scope of this introductory (version 1) algorithms introduced in this study (no surprise it implies a significant share of extra work to get this done in a neat form).*

Page 23

A33, #20: why the derivative of  $\alpha$  wrt  $\theta$  is not considered?

*Thank you for spotting this, this was left as a bug in latex-setting here; of course this added term is needed under the square root (p23, L20); it is now added in there.*

Page 24 and Page 25

I'd remove both A2.2 and A2.3. See issue 1) in the general comment section And, by the way, the effect of the apparent systematic uncertainty in the lower troposphere seems "crucial" but not still fully accepted (the paper is under review). It is worth to have the WO/merging part properly described elsewhere in the future, as soon as the results associated to the uncertainty propagation through WO algorithms will be available.

*I hope we could address this concern sufficiently with our detailed response to general comment 1, and our related updates quoted there. As expressed there, we strongly consider our approach important for using this paper as properly in future together with the other rOPS introduction papers.*

Page 27:

#3: here you are talking about a "more advanced form" of  $\alpha_{L2}$  extrapolation which is described in a technical report not publicly available. Provide other references if possible or avoid to cite it.

*We understand this concern, and in other contexts than the rOPS-related set of papers and underlying documentation would simply agree; but given it is this special context (see again our response to general comment 6) we strongly prefer to keep this way back-referencing to an even more detailed source that (we can guarantee) will become open "background publication" (and should be linked to all "foreground papers").*

#13: see above. Provide other references if possible, or avoid to cite it.

*Please see the previous comment.*



Page 28:

Eq A48, #10: why the coefficient are squared? Is it because the CP foreseen to multiply the model and its transpose?

*It is due to the application of the general uncertainty propagation rule (e.g., GUM part for treatment of uncertainties for multivariate data) – can be viewed as a generalization to covariance matrices of the well-known uncertainty propagation rule of the form  $u_z^2 = (dz/dx)^2 u_x^2 + (dz/dy)^2 u_y^2$  that applies to variances.*

#15-17: Clarify this sentence.

*Ok, we updated on p28, L15-17, to: “where it is assumed that the systematic errors in  $\alpha_{F1}$  and  $\alpha_{F2}$  are positively correlated, i.e., have the same sign, and the associated uncertainty estimates are hence subtracted from one another (as the bending angles are in Equation A46). This assumption is reasonable, since the same sources of non-ionospheric systematic effects apply to both frequency channels (Doppler shift, orbit velocity, and orbit position uncertainties).”*

#29: the Healy/Culverwell cited paper refers basically to a new ionospheric correction schema. Are there plans to introduce this in rOPS and to evaluate also how uncertainties are propagated through it?

*Yes, it is planned to implement the higher-order correction of Healy-Culverwell in the rOPS, and to evaluate how it possibly helps to reduce the  $us\_RIB$  due to actively modeling and subtracting this “higher-order ionospheric bias”.*

Page 29

# 19: see previous comments on this.

*Please see the previous answers to this.*

## Technical comments

Page 3

#28: typo: validation

*Thanks, corrected to “validation” (p3, L28).*

Page 5

#28: introduce what the subscript “r” stands for, even if there is a table in support of all the definitions.

We added "retrieved" before "excess phase profile" on p5, in L27.

Page 7

#24: make reference to Fig 3b)

We inserted this on p7 in L29 in the form "...smooth these simple uncertainty models around these transition altitudes (for the example profile,  $u^s_{Lr}$  is visible in Figure 3b)."

Page 8

#14:  $\alpha_G(k(z_a))$  is repeated. Moreover  $\alpha_M(k(z_a))$  is never shown. Remove it

*These are two different variables, since the coordinate variable (the argument) changes.  $\alpha_M$  and the two different  $\alpha_G$ 's are shown in figure 2, which we refer to in this paragraph. Also the algorithm for calculating  $\alpha_M$  and its uncertainties is presented (please see also our arguments concerning general comment 1).*

Page 10

#16: add "making negligible the systematic uncertainty integrated from the phase/Doppler"

*Please see in the previous relevant comment how we have changed this; it is accounted for now.*

Page 13

#10: is this recombined MC covariance matrix the one defined through Eq. 10? If yes, put a reference to the equation.

Ok, added reference to Eq. 10 in L10, p13: "...how far down the MC covariance matrix (Equation 10) reaches."

#28-32: here you provided a mention another possible method for estimate uncertainties along the processing chain (variance propagation). Totally fine. But it would be nice that it is properly introduced somehow in Sect 2.1.

We inserted a paragraph on p5, L11ff, as follows: "Since the covariance propagation of random uncertainties requires extensive matrix multiplications for each measurement model along the entire retrieval chain, we also tested simpler variance propagation, for which correlations are ignored; Appendix B summarizes the relevant algorithms. However, as shown in Section 4, variance propagation unduly overestimates random uncertainties so that covariance propagation is required. ...When the operator is linear..."

Page 14: "minor channel". Please reword this. In GNSS we do not have minor/major channels. We have channels associated to the lower and higher carrier frequencies or, simply channel associated to the L1 or L2 carrier frequencies. Also Page 26, #4 and #8, Page 27 #8. Page 45, Figure 10 caption (leading ? channel)

*We did not immediately find a better term expressing what we want to say with „leading channel“ and „minor channel“ from the point of view of the algorithmic approach (not the point of view of GNSS, or RO as a method). We would, however, if we have a good idea also correct this in the editing of a final production manuscript.*

Page 19

#9: typo: derivative scheme

*Thanks, we corrected to "derivative" (L9, p19).*

Page 22

#7: I'd add: "In the GO approximation, the bending angle values at each grid point only depend on..."

*Thanks, extended the beginning of the sentence on p22, L8, to: "In the GO approximation, the bending angle values..."*

Figures 3-11: It would be nice to have also the uncertainty (random and systematic) plotted as relative values (relative to the state variable profile)

*Please refer to our response to comment p9, L20 (and one other related comment).*
